# Supplementary material for: Cryptic Diversity in Indo-Pacific Coral-Reef Fishes Revealed by DNA-Barcoding Provides New Support to the Centre-of-Overlap Hypothesis
Source: PubMed Central journal article supplement (PMC3305298; doi:10.1371/journal.pone.0028987), 2012-03-15

# BOLD TaxonID Tree

Project : MERGED: {MBFC,FPFL,IPCOM,MBFA,MBFB,SBF}

Subprojects : Acanthurids and Holocentrids[MBFC]

Barcoding French Polynesia fish larvae[FPFL]

Indo-Pacific reef fish community assembly[IPCOM]

Moorea Biocode Fishes I[MBFA]

Moorea Biocode Fishes II[MBFB]

SWIO Biocode Fishes[SBF]

Date : 30-January-2012

Data Type : Nucleotide

Distance Model : Kimura 2 Parameter

Marker : COI-5P

Codon Positions : 1st, 2nd, 3rd

Labels : SampleID, Family,

Filters : Length > 200

Colorization : tax\_family

  

Sequence Count : 1387

Species count : 470

Genus count : 201

Family count : 66

Unidentified : 0

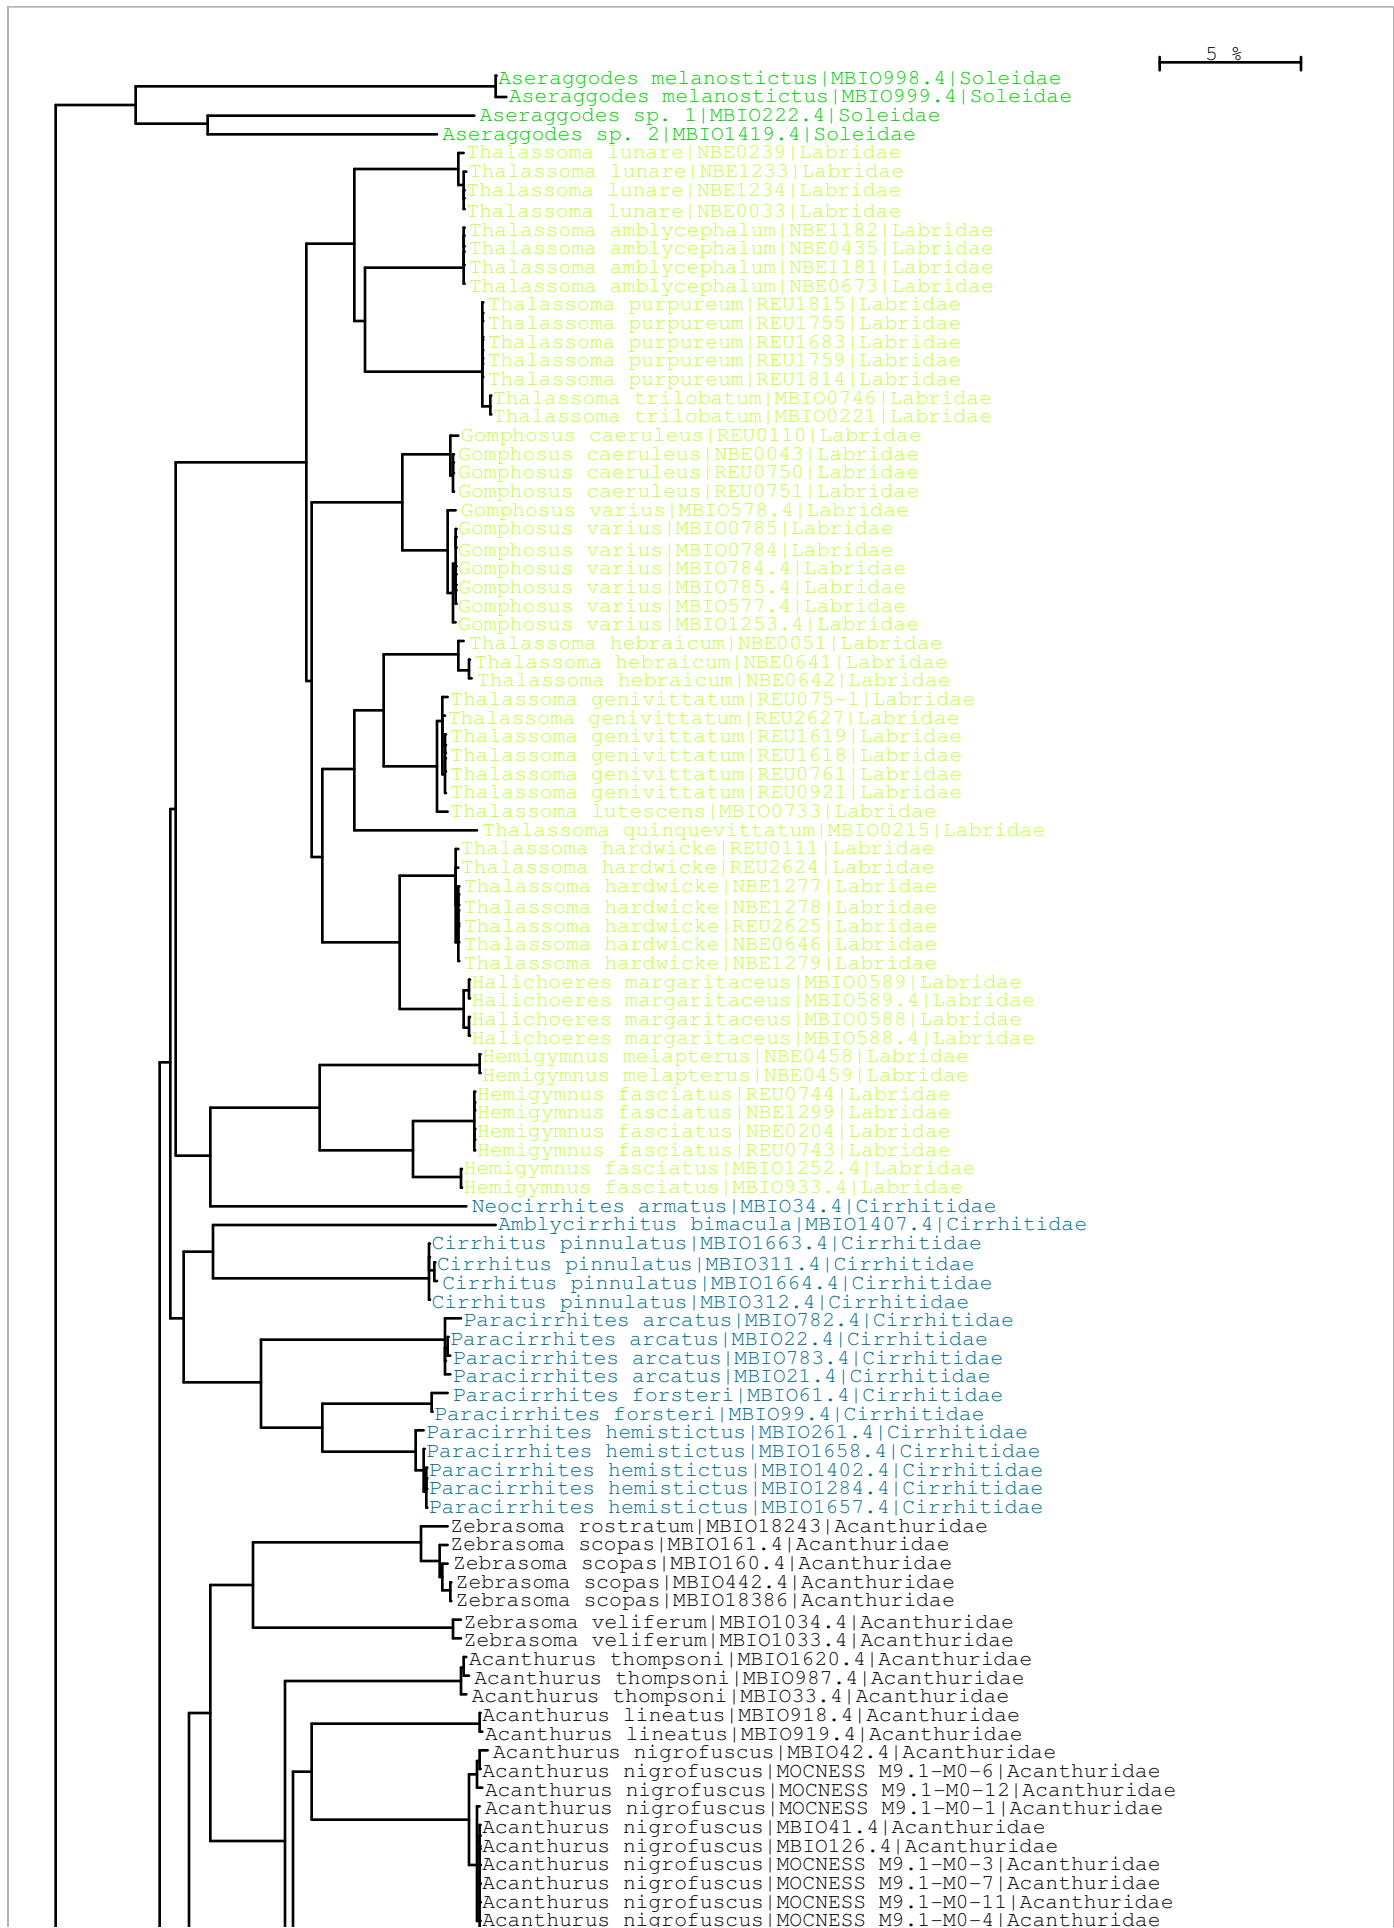

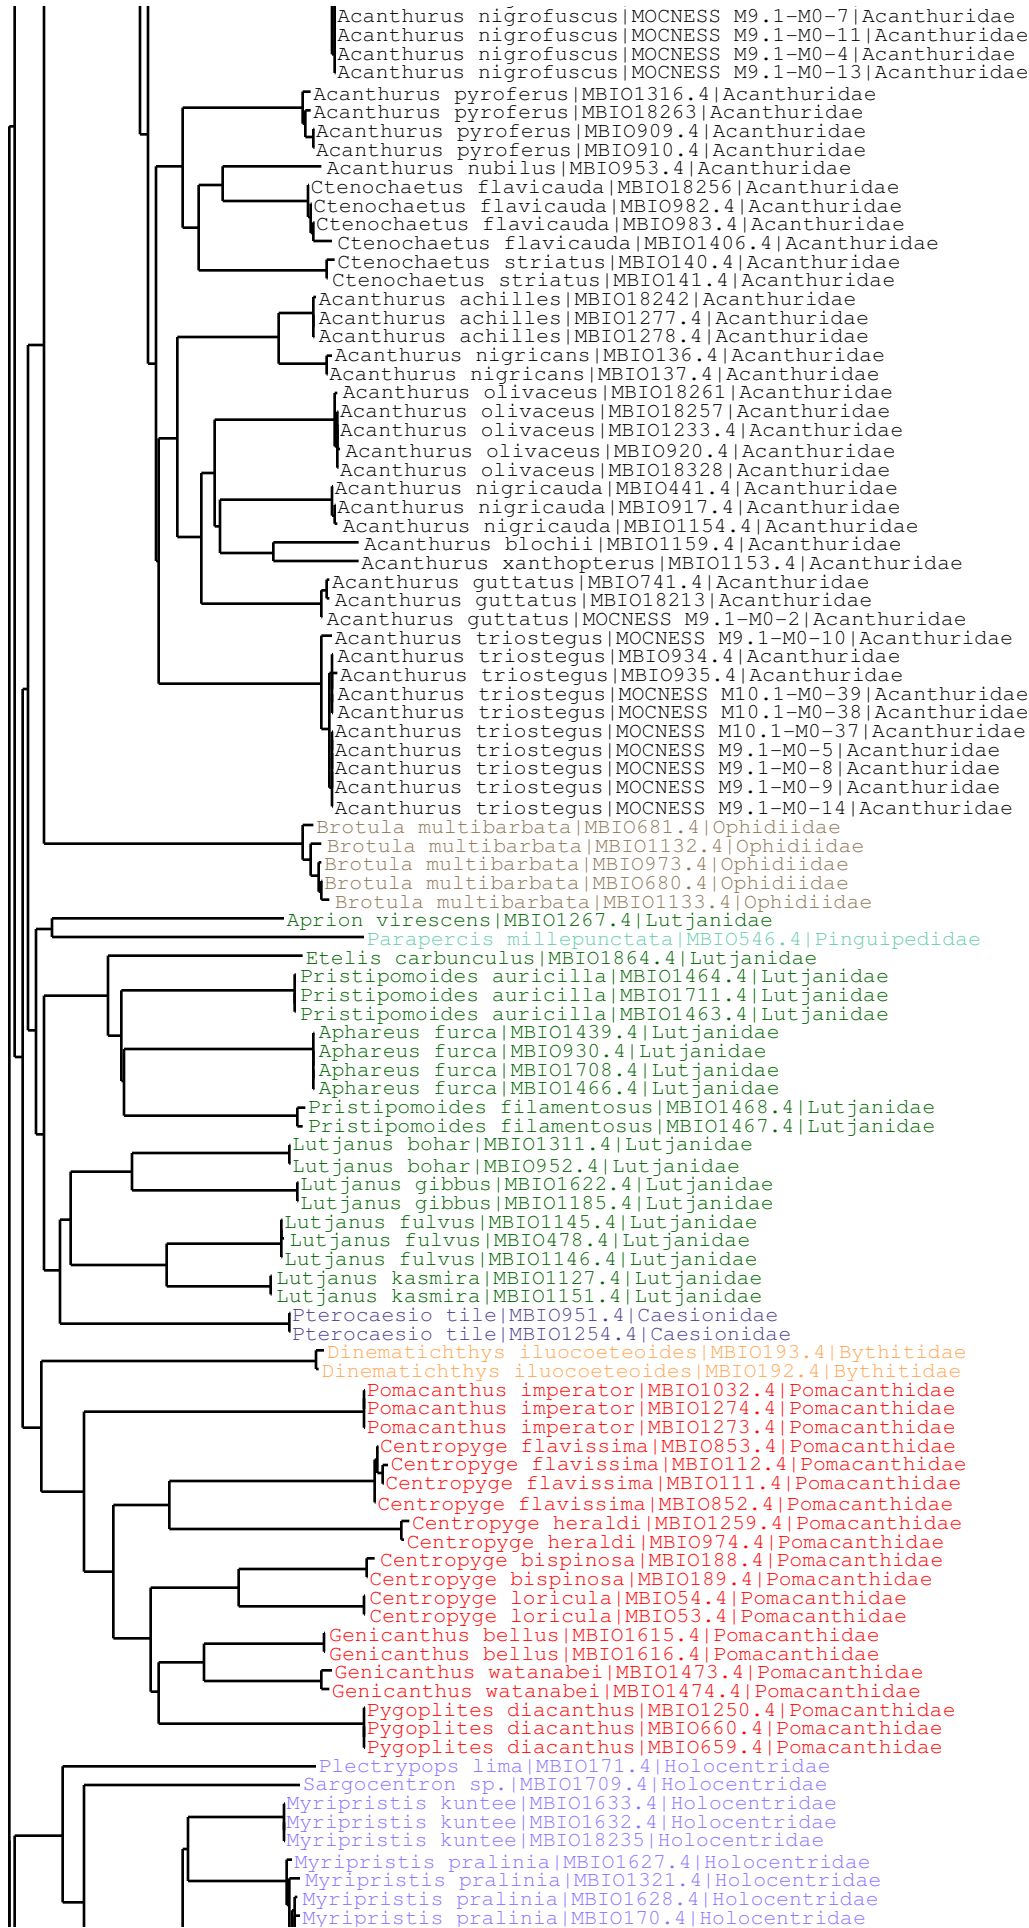

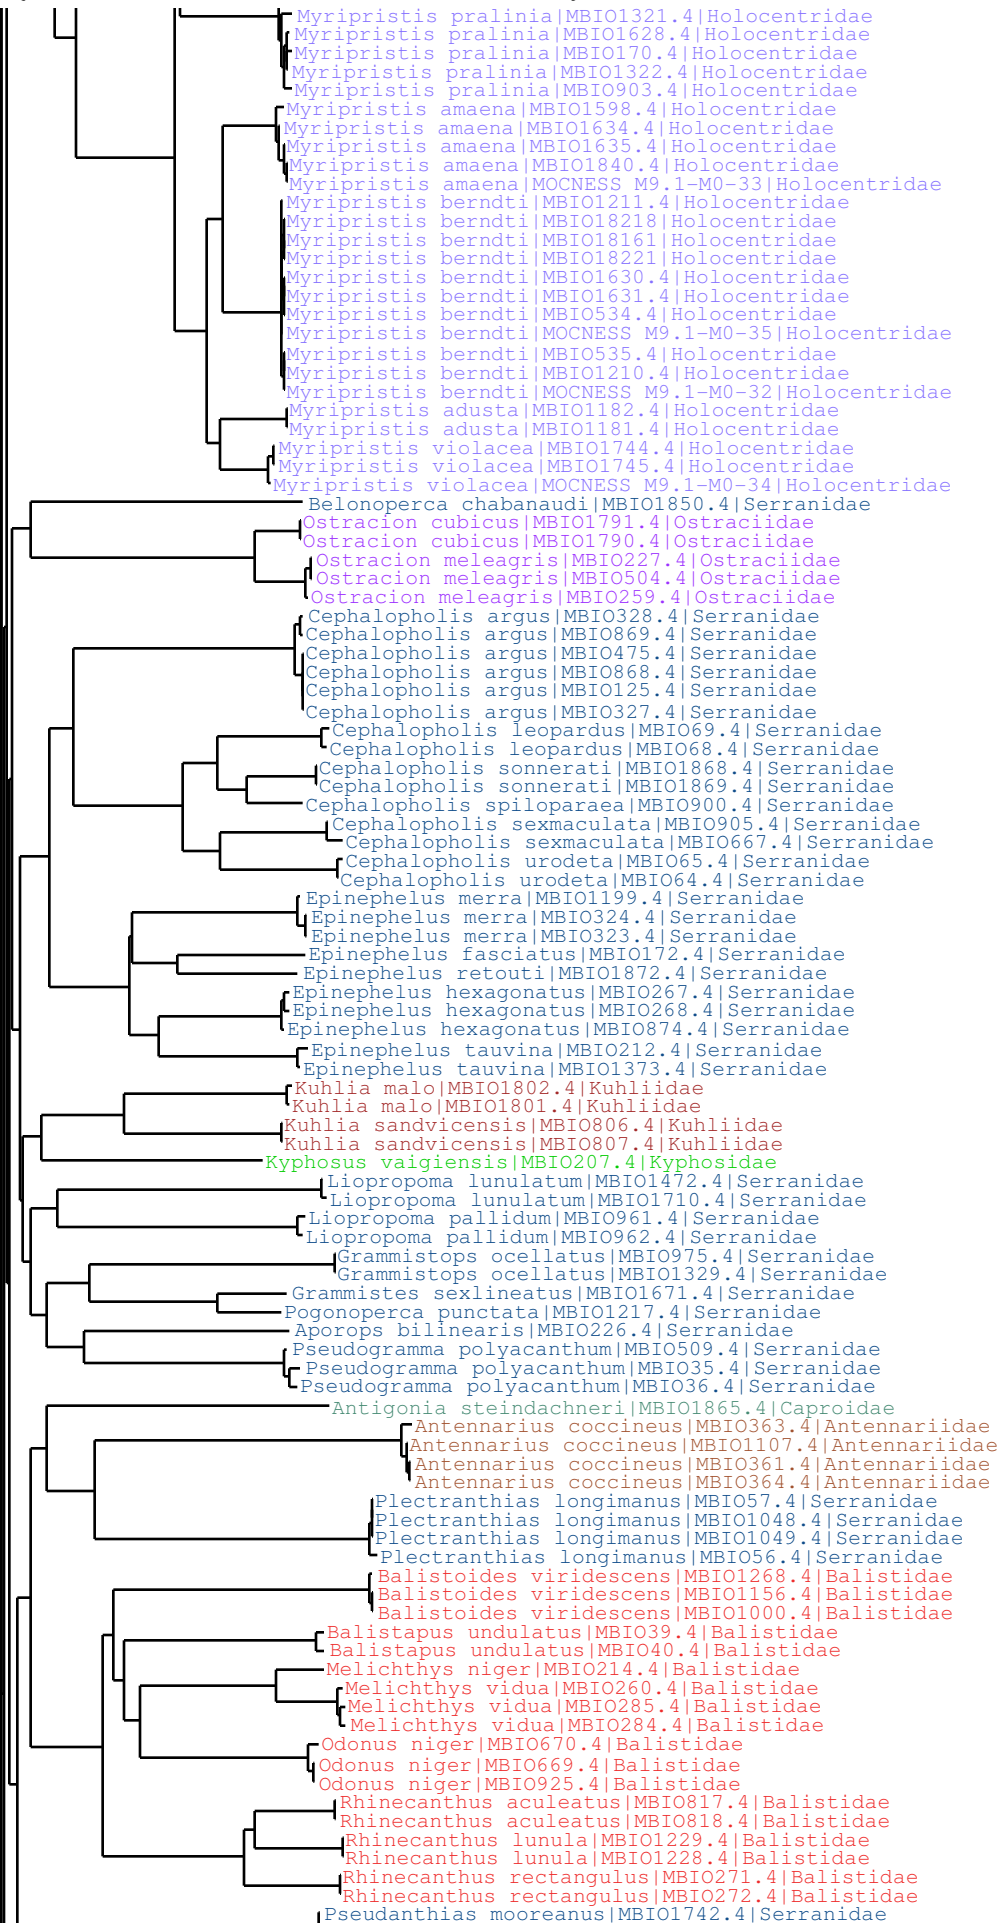

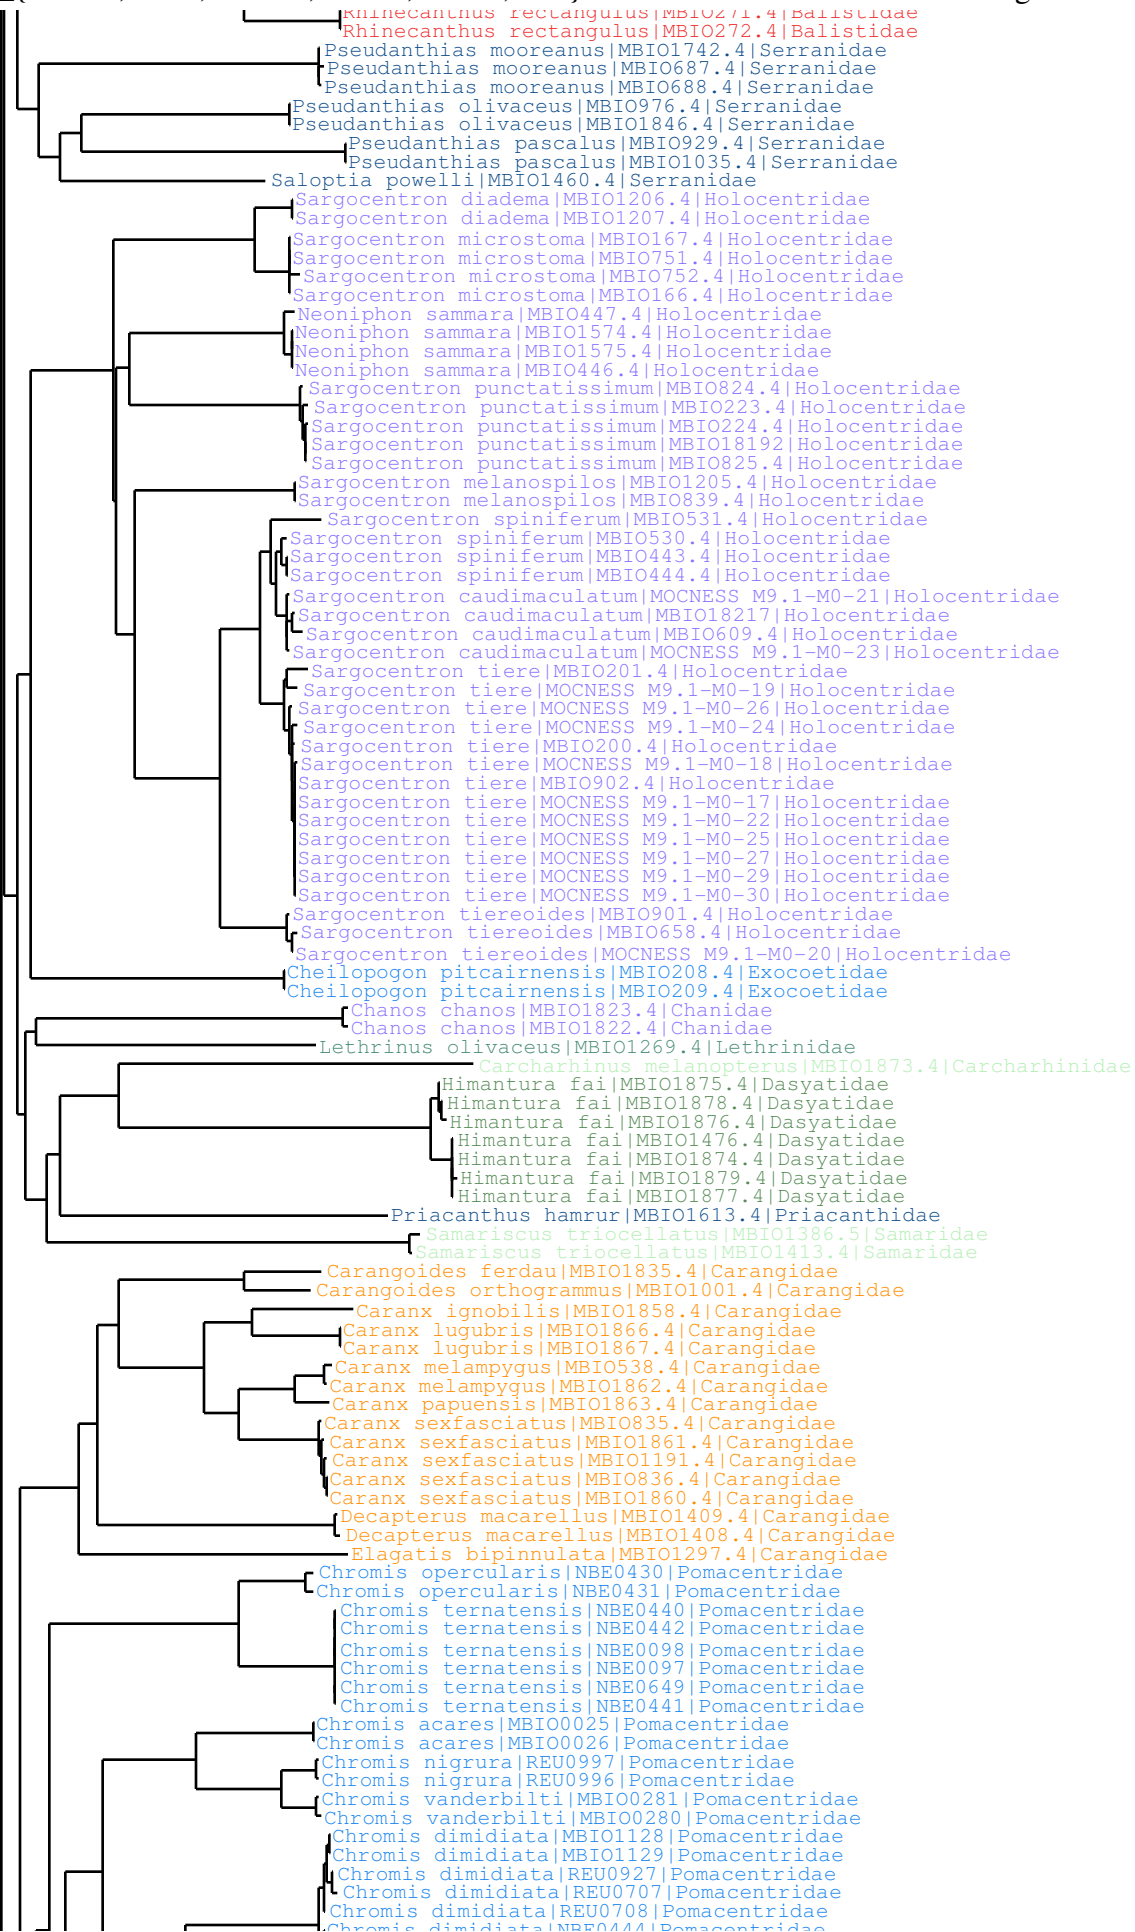

Chromis dimidiata|REU0707|Pomacentridae  
 Chromis dimidiata|REU0708|Pomacentridae  
 Chromis dimidiata|NBE0444|Pomacentridae  
 Chromis dimidiata|NBE0447|Pomacentridae  
 Chromis dimidiata|NBE0448|Pomacentridae  
 Chromis dimidiata|REU0706|Pomacentridae  
 Chromis dimidiata|NBE0056|Pomacentridae  
 Chromis agilis|MBIO1224|Pomacentridae  
 Chromis iomelas|MBIO0095|Pomacentridae  
 Chromis iomelas|MBIO96.4|Pomacentridae  
 Chromis alpha|MBIO0946|Pomacentridae  
 Chromis alpha|MBIO0947|Pomacentridae  
 Chromis weberi|NBE1239|Pomacentridae  
 Chromis weberi|NBE1238|Pomacentridae  
 Chromis xanthochira|NBE0439|Pomacentridae  
 Chromis xanthochira|NBE0105|Pomacentridae  
 Chromis xanthochira|REU0709|Pomacentridae  
 Chromis xanthochira|NBE0196|Pomacentridae  
 Chromis xanthochira|NBE0112|Pomacentridae  
 Chromis xanthochira|NBE0595|Pomacentridae  
 Chromis xanthura|MBIO0945|Pomacentridae  
 Chromis xanthura|MBIO1264|Pomacentridae  
 Chromis chrysurā|REU0712|Pomacentridae  
 Chromis chrysurā|REU0711|Pomacentridae  
 Chromis chrysurā|REU0986|Pomacentridae  
 Chromis chrysurā|REU0710|Pomacentridae  
 Chromis atripectoralis|NBE0024|Pomacentridae  
 Chromis atripectoralis|NBE1076|Pomacentridae  
 Chromis atripectoralis|NBE1019|Pomacentridae  
 Chromis atripectoralis|NBE0023|Pomacentridae  
 Chromis atripectoralis|MBIO764.4|Pomacentridae  
 Chromis atripectoralis|MBIO763.4|Pomacentridae  
 Chromis viridis|MBIO490.4|Pomacentridae  
 Chromis viridis|MBIO489.4|Pomacentridae  
 Chromis viridis|NBE1072|Pomacentridae  
 Chromis viridis|NBE1074|Pomacentridae  
 Chromis viridis|NBE1073|Pomacentridae  
 Chromis viridis|NBE1075|Pomacentridae  
 Chromis viridis|REU0118|Pomacentridae  
 Chromis viridis|REU077-1|Pomacentridae  
 Chromis viridis|REU269-1|Pomacentridae  
 Chromis viridis|MBIO768.4|Pomacentridae  
 Chromis viridis|MBIO769.4|Pomacentridae  
 Dascyllus aruanus|REU004-2|Pomacentridae  
 Dascyllus aruanus|NBE0188|Pomacentridae  
 Dascyllus aruanus|REU004-1|Pomacentridae  
 Dascyllus aruanus|REU2764|Pomacentridae  
 Dascyllus aruanus|REU2765|Pomacentridae  
 Dascyllus aruanus|NBE0189|Pomacentridae  
 Dascyllus aruanus|NBE0187|Pomacentridae  
 Dascyllus aruanus|MBIO787.4|Pomacentridae  
 Dascyllus aruanus|MBIO786.4|Pomacentridae  
 Dascyllus aruanus|MBIO556.4|Pomacentridae  
 Dascyllus aruanus|MBIO557.4|Pomacentridae  
 Dascyllus carneus|NBE0598|Pomacentridae  
 Dascyllus carneus|NBE0599|Pomacentridae  
 Dascyllus carneus|NBE0597|Pomacentridae  
 Dascyllus carneus|NBE0199|Pomacentridae  
 Dascyllus flavicaudus|MBIO0045|Pomacentridae  
 Dascyllus flavicaudus|MBIO0046|Pomacentridae  
 Dascyllus flavicaudus|MBIO773.4|Pomacentridae  
 Dascyllus trimaculatus|REU0931|Pomacentridae  
 Dascyllus trimaculatus|REU0932|Pomacentridae  
 Dascyllus trimaculatus|REU0988|Pomacentridae  
 Dascyllus trimaculatus|MBIO1262.4|Pomacentridae  
 Dascyllus trimaculatus|MBIO1043.4|Pomacentridae  
 Abudefduf margariteus|REU0925|Pomacentridae  
 Abudefduf margariteus|REU0981|Pomacentridae  
 Abudefduf sparoides|REU0970|Pomacentridae  
 Abudefduf sparoides|REU195-1|Pomacentridae  
 Abudefduf sparoides|NBE0640|Pomacentridae  
 Abudefduf sparoides|NBE0198|Pomacentridae  
 Abudefduf sparoides|REU0969|Pomacentridae  
 Abudefduf sparoides|REU0971|Pomacentridae  
 Abudefduf sexfasciatus|NBE0185|Pomacentridae  
 Abudefduf sexfasciatus|NBE0184|Pomacentridae  
 Abudefduf vaigiensis|REU1687|Pomacentridae  
 Abudefduf vaigiensis|NBE0251|Pomacentridae  
 Abudefduf sexfasciatus|MBIO707.4|Pomacentridae  
 Abudefduf sexfasciatus|MBIO706.4|Pomacentridae  
 Abudefduf septemfasciatus|NBE0017|Pomacentridae  
 Abudefduf septemfasciatus|MBIO451.4|Pomacentridae  
 Abudefduf septemfasciatus|MBIO450.4|Pomacentridae  
 Abudefduf septemfasciatus|MBIO821.4|Pomacentridae  
 Abudefduf sordidus|NBE0671|Pomacentridae  
 Abudefduf sordidus|NBE0670|Pomacentridae  
 Abudefduf sordidus|NBE0669|Pomacentridae  
 Abudefduf sordidus|REU1686|Pomacentridae  
 Abudefduf sordidus|REU1682|Pomacentridae  
 Abudefduf sordidus|MBIO1644.4|Pomacentridae  
 Stegastes lividus|REU2754|Pomacentridae  
 Stegastes lividus|REU001-2|Pomacentridae  
 Stegastes lividus|REU001-1|Pomacentridae  
 Stegastes lividus|REU2755|Pomacentridae  
 Stegastes albifasciatus|MBIO0732|Pomacentridae  
 Stegastes limbatus|REU1654|Pomacentridae  
 Stegastes limbatus|REU002-2|Pomacentridae  
 Stegastes limbatus|REU002-1|Pomacentridae  
 Stegastes limbatus|REU2774|Pomacentridae  
 Stegastes limbatus|REU2775|Pomacentridae  
 Stegastes limbatus|REU2776|Pomacentridae  
 Stegastes limbatus|REU2777|Pomacentridae



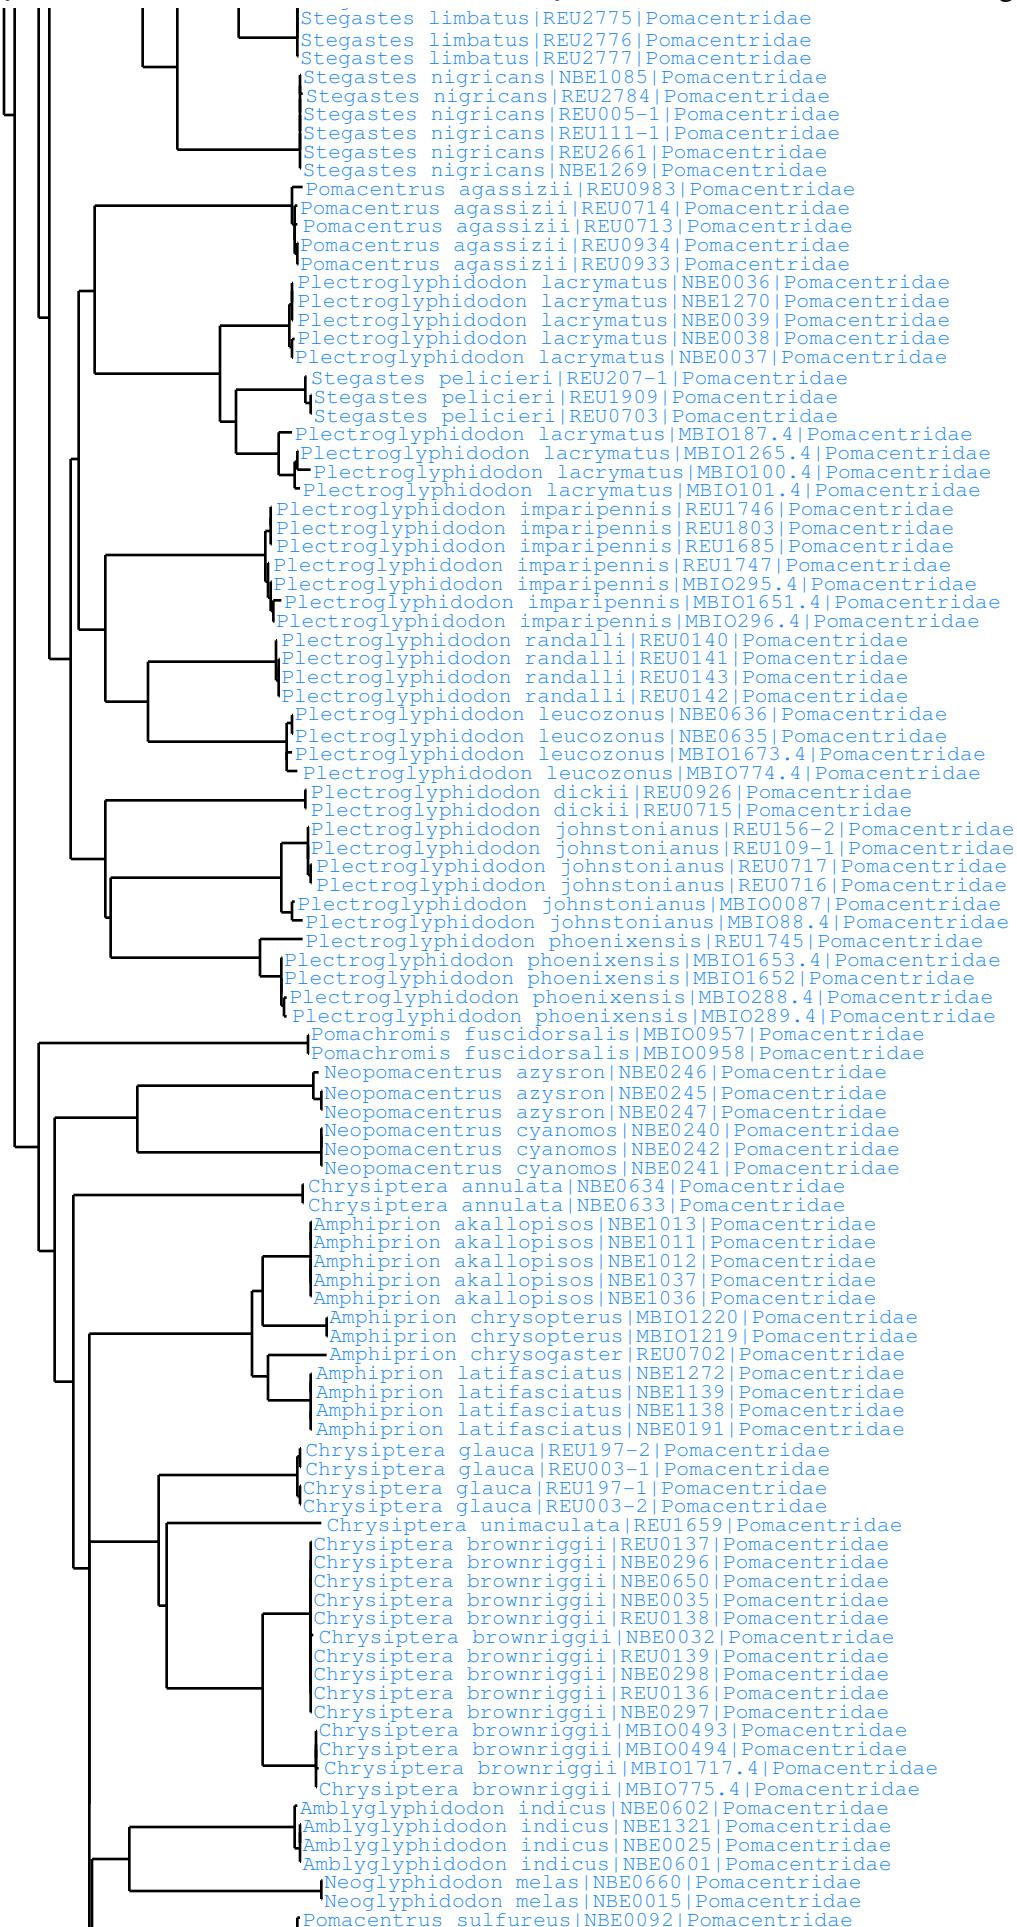

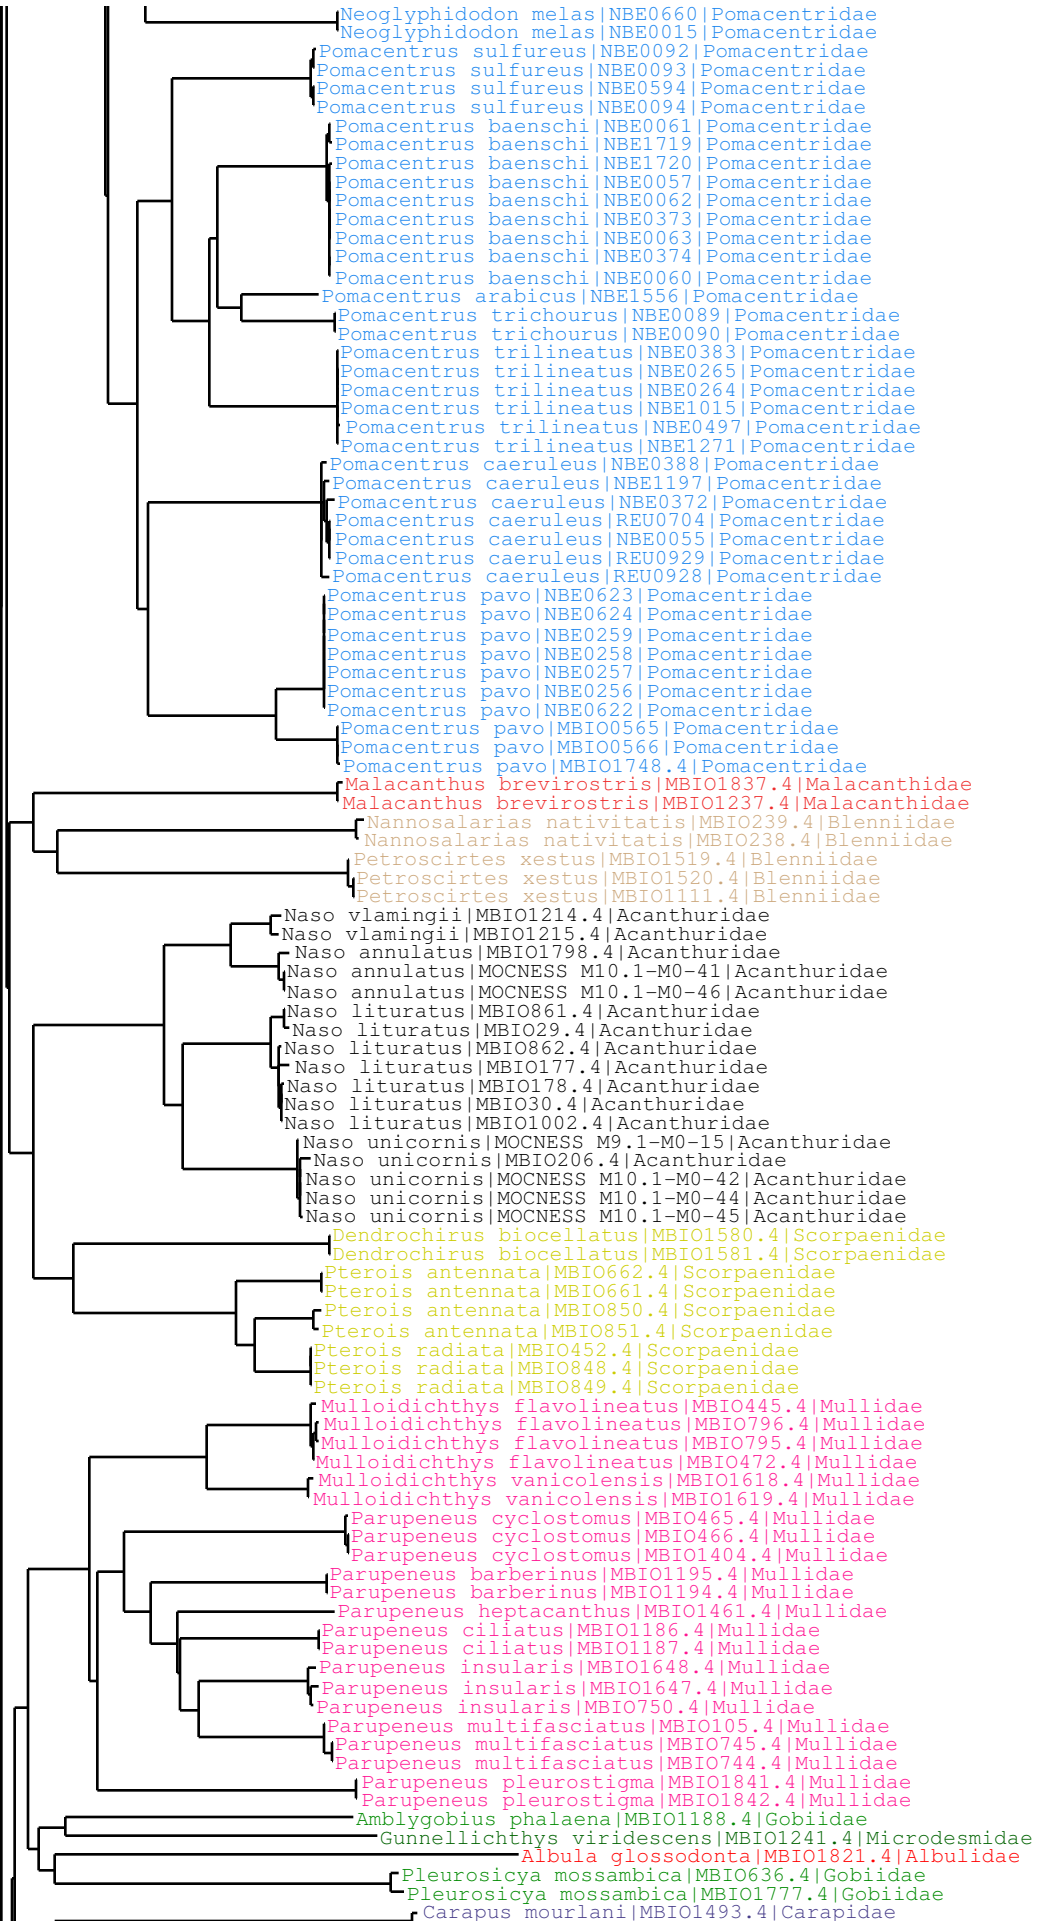



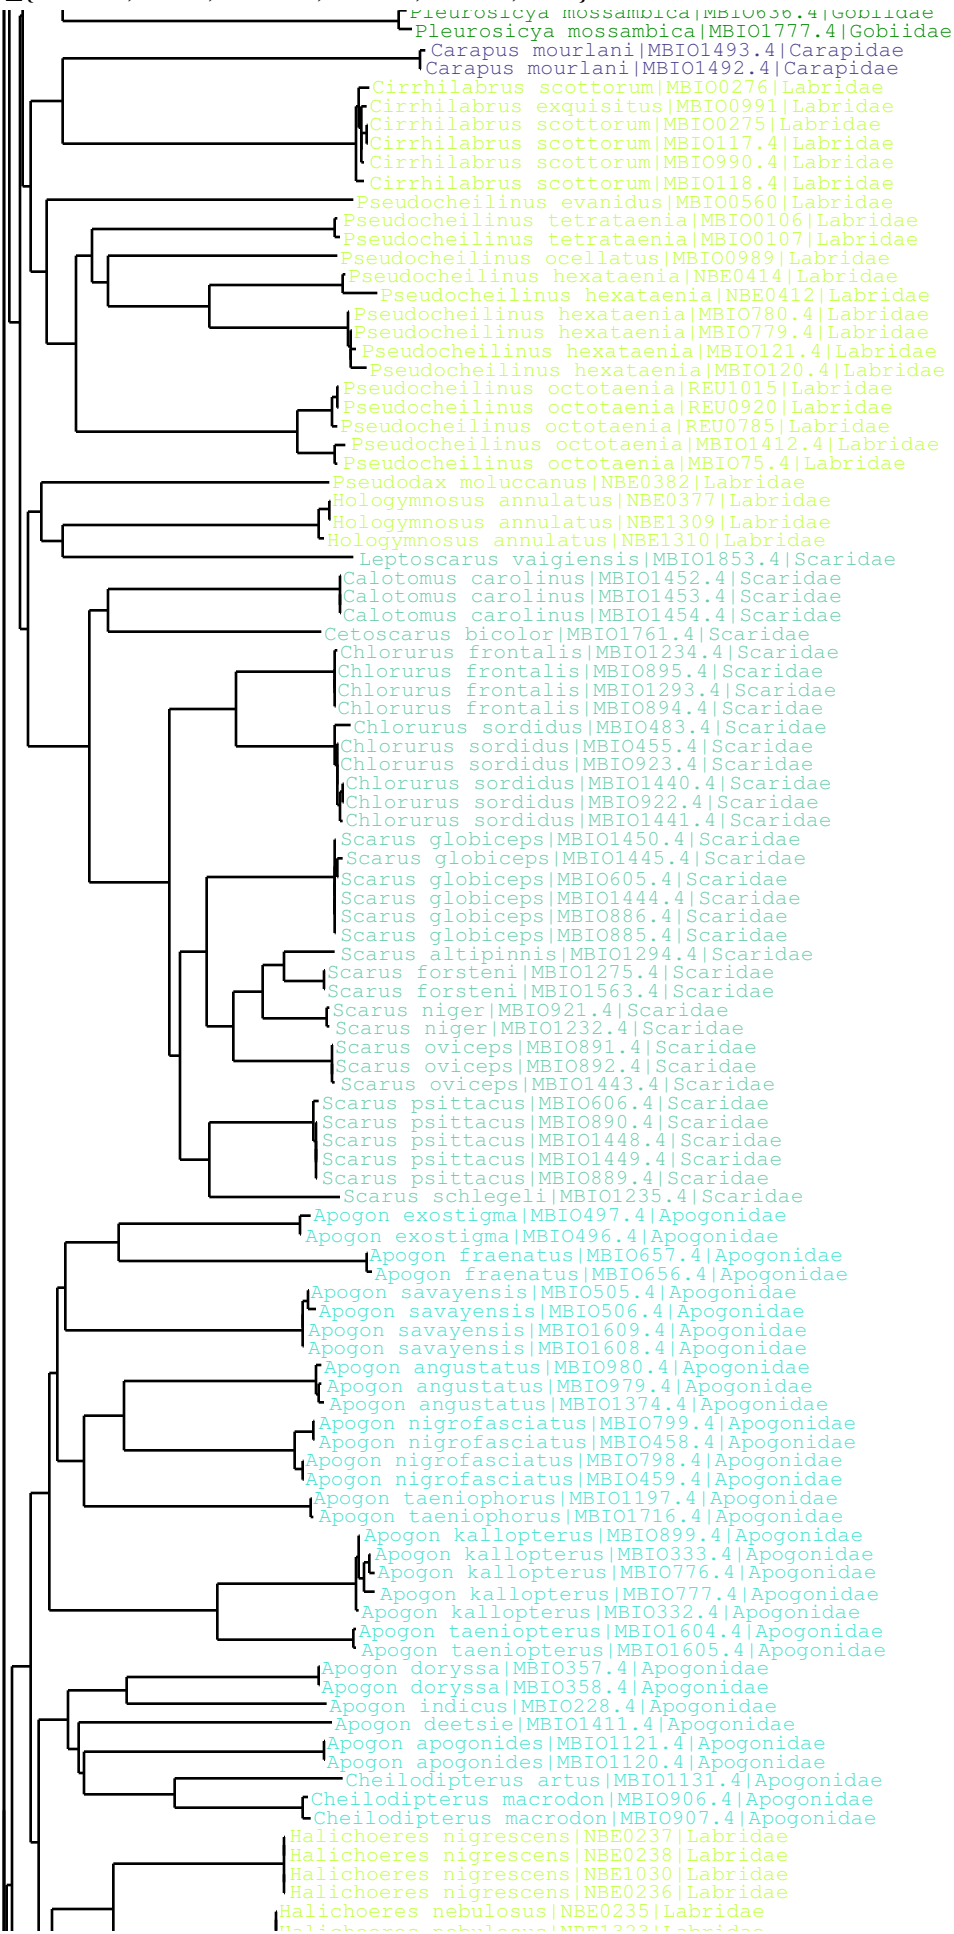

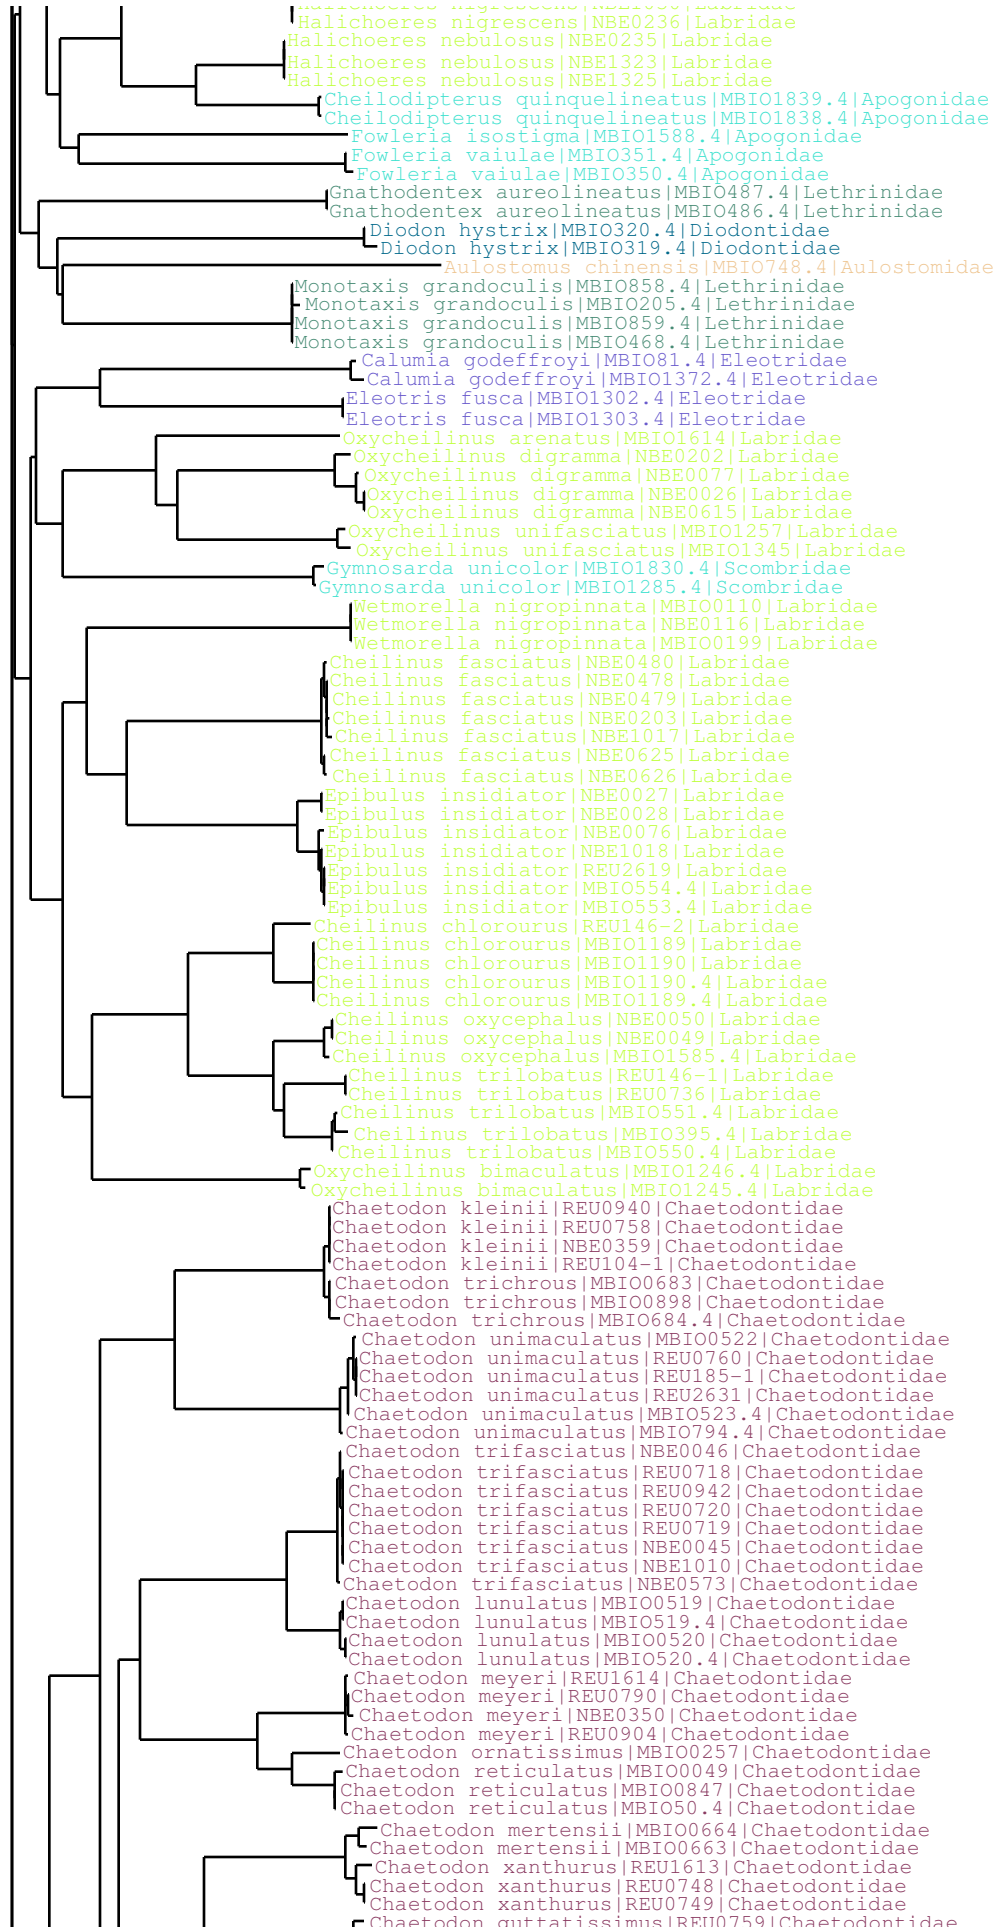

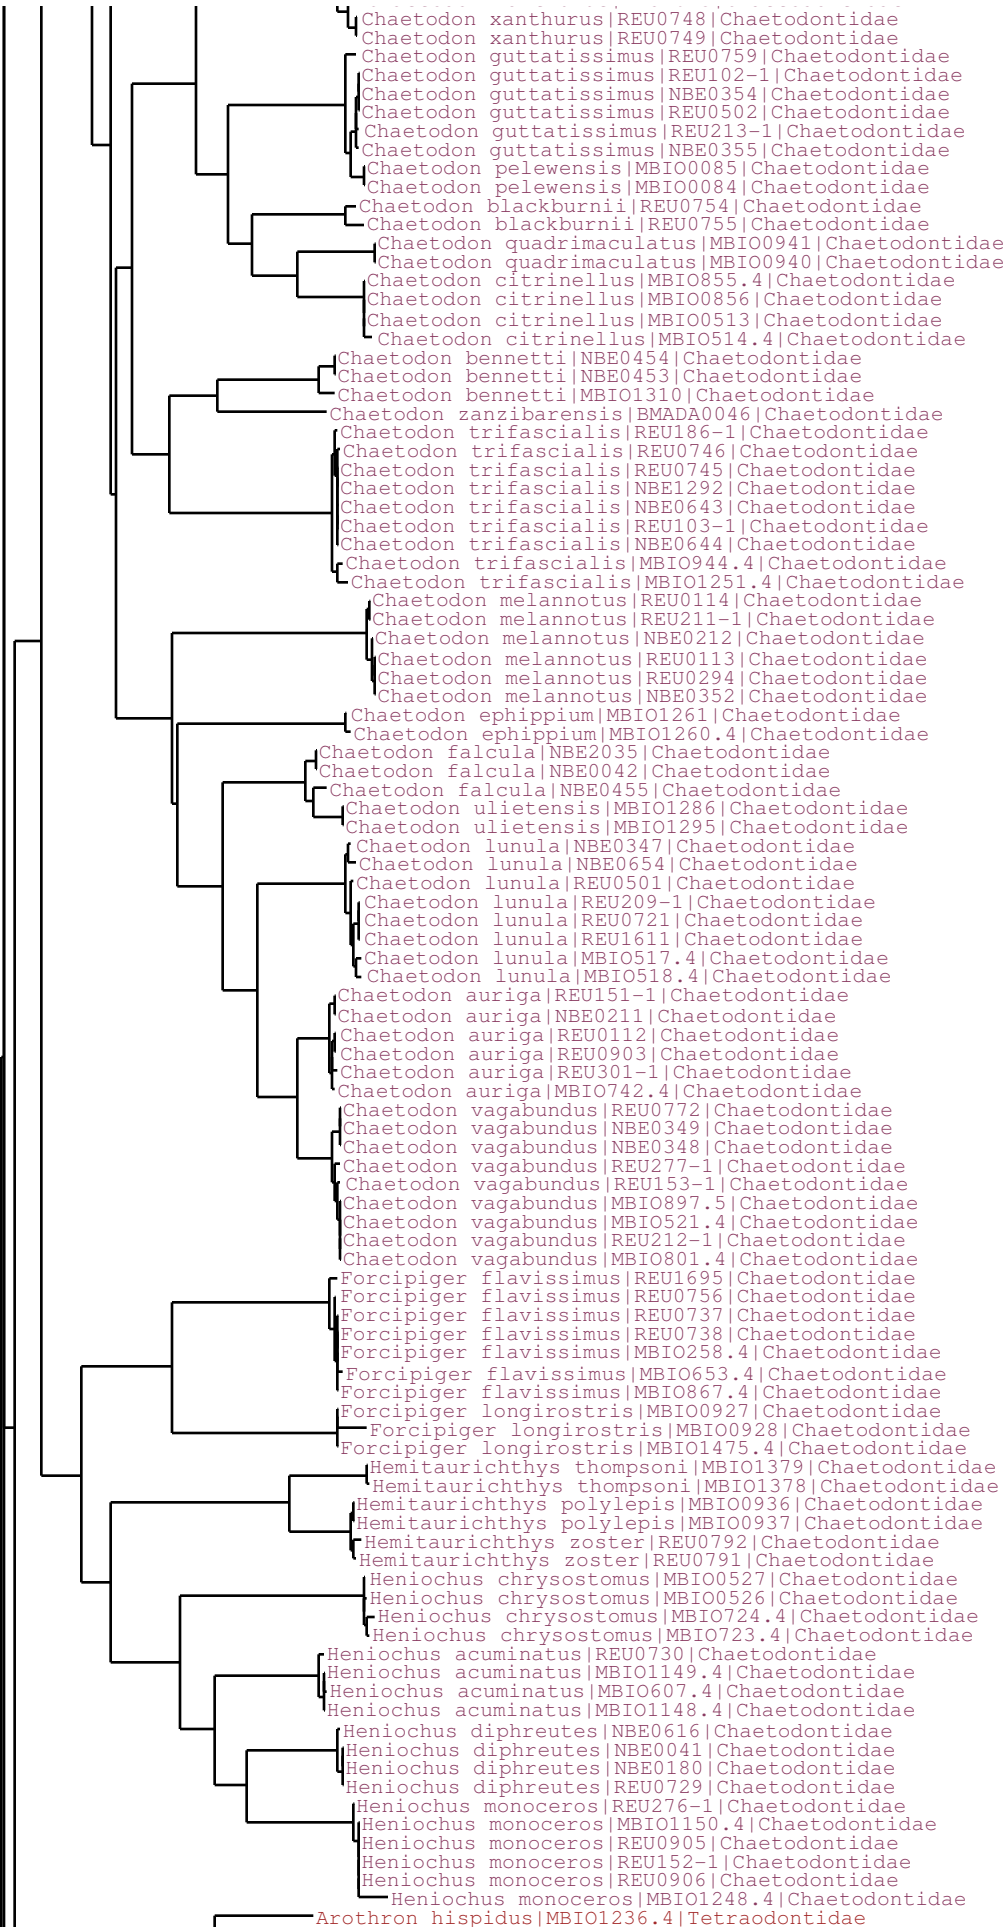

Arothron hispidus|MBIO1236.4|Tetraodontidae

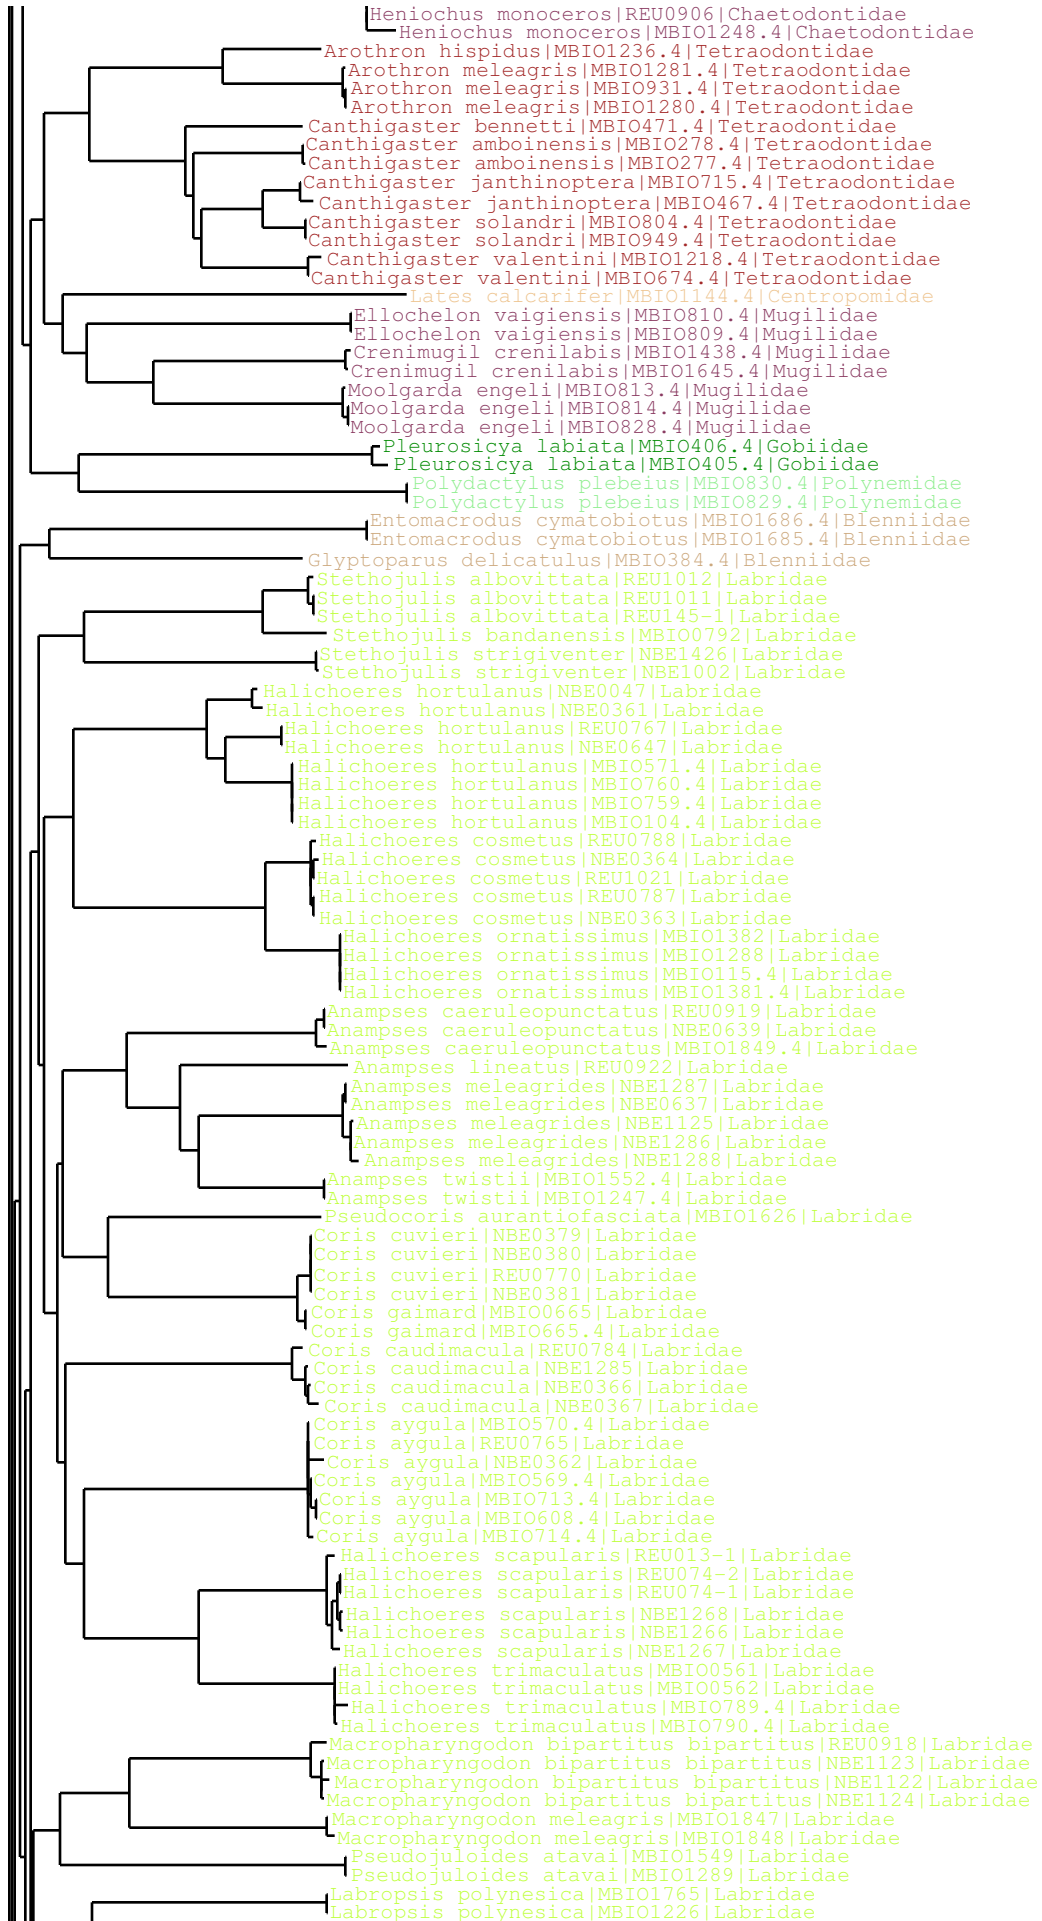

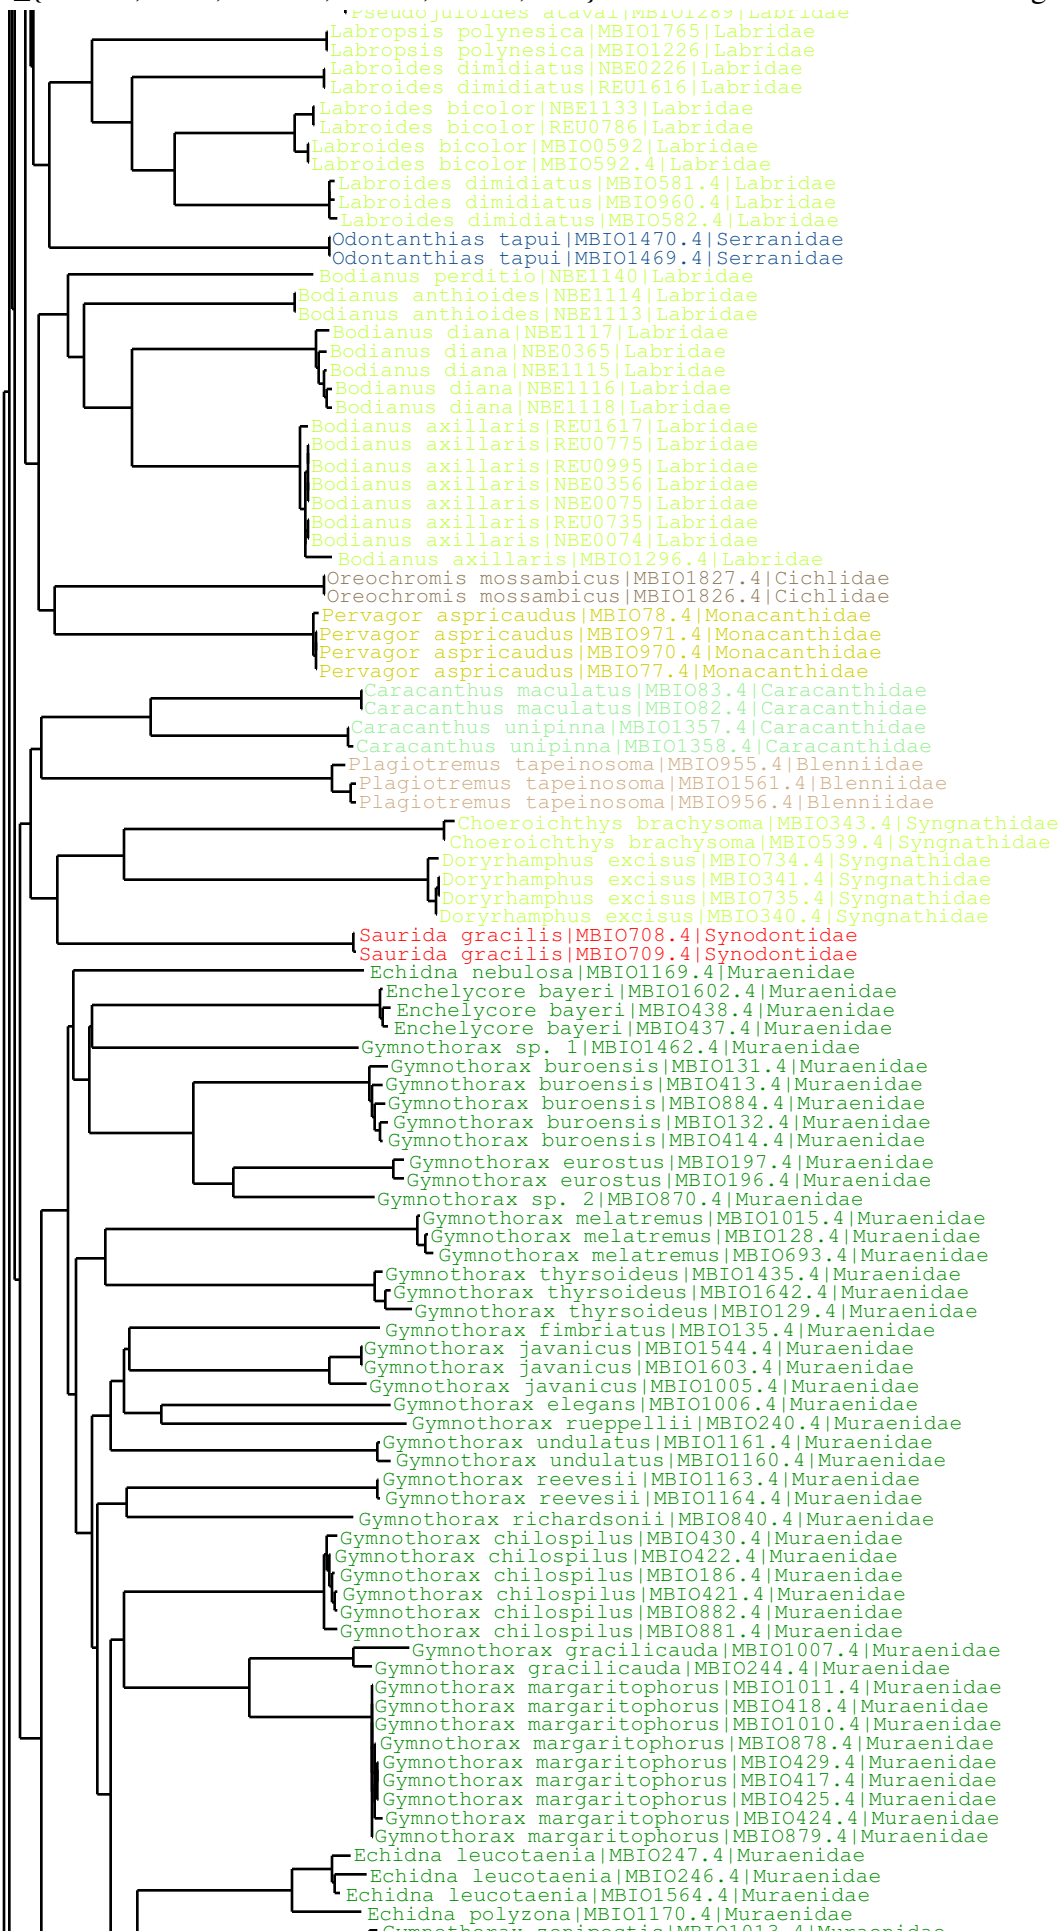



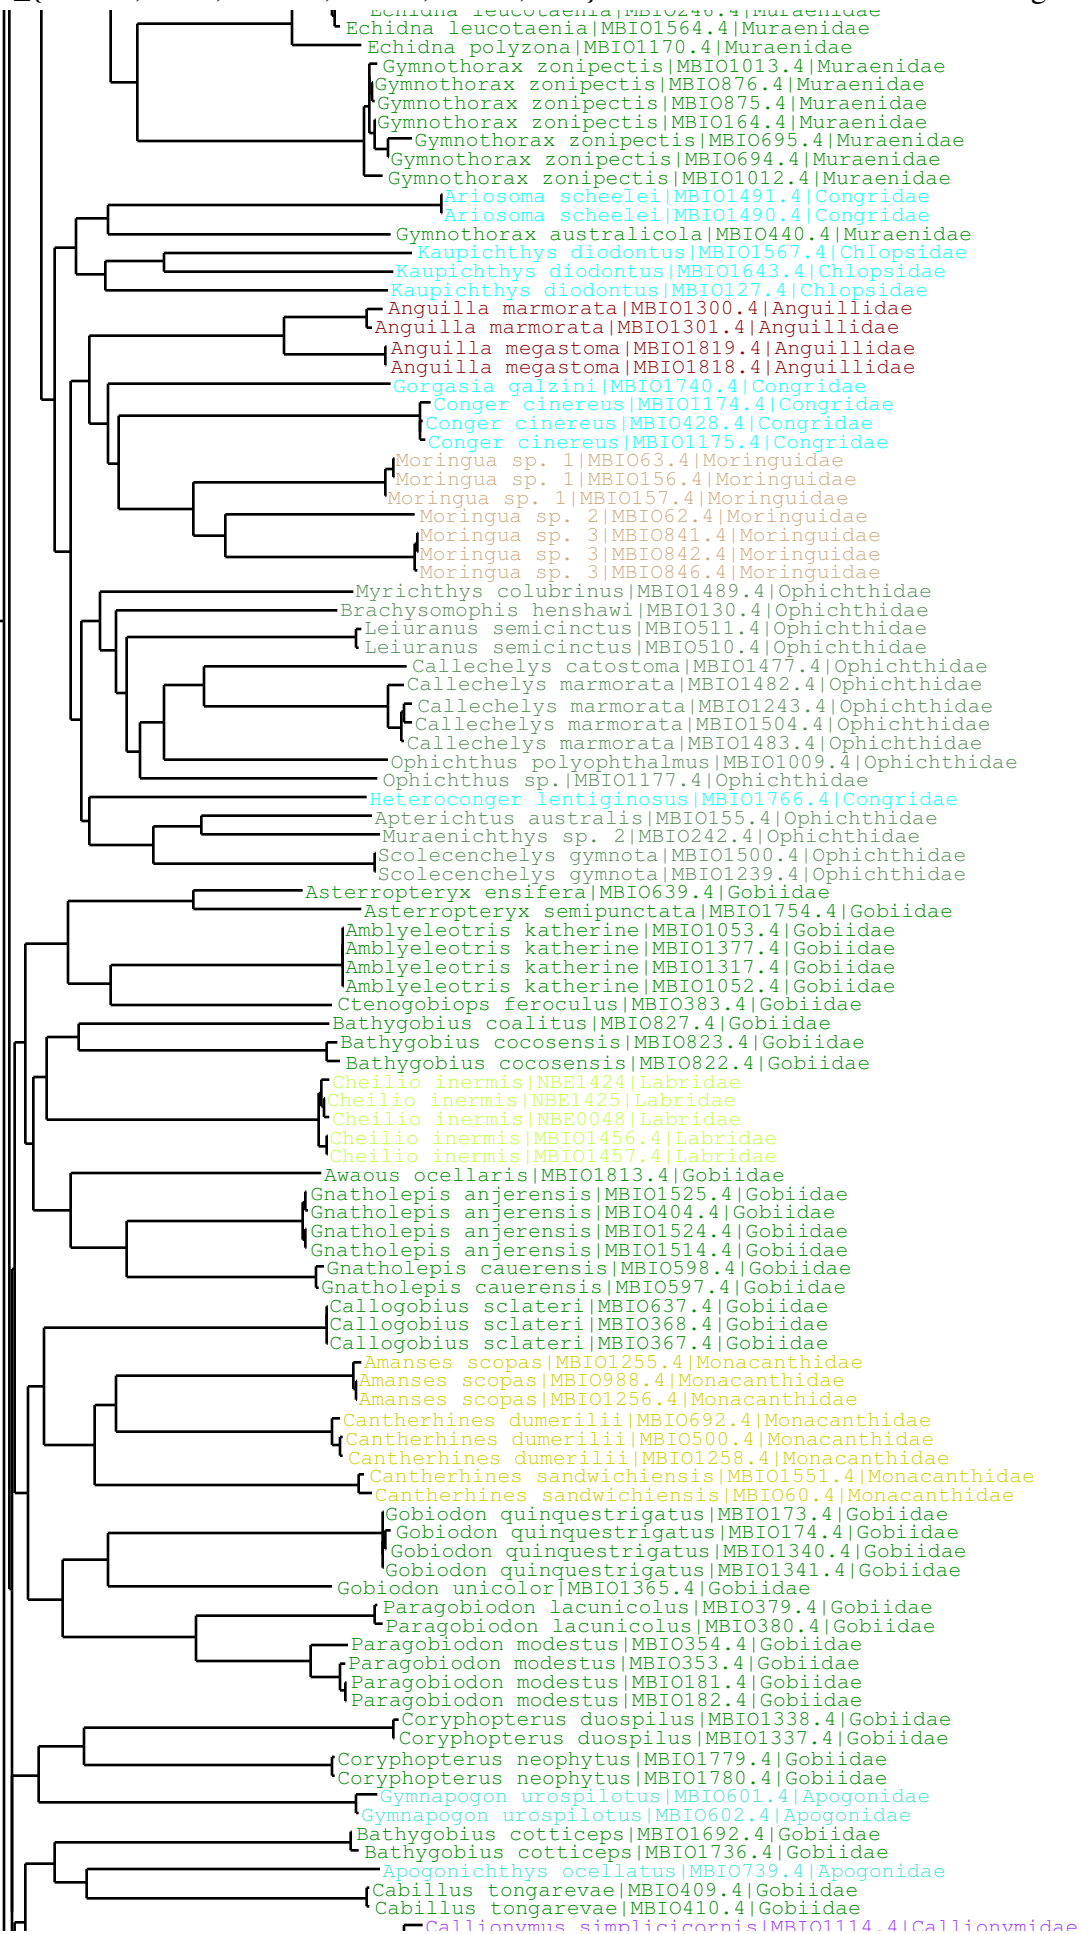



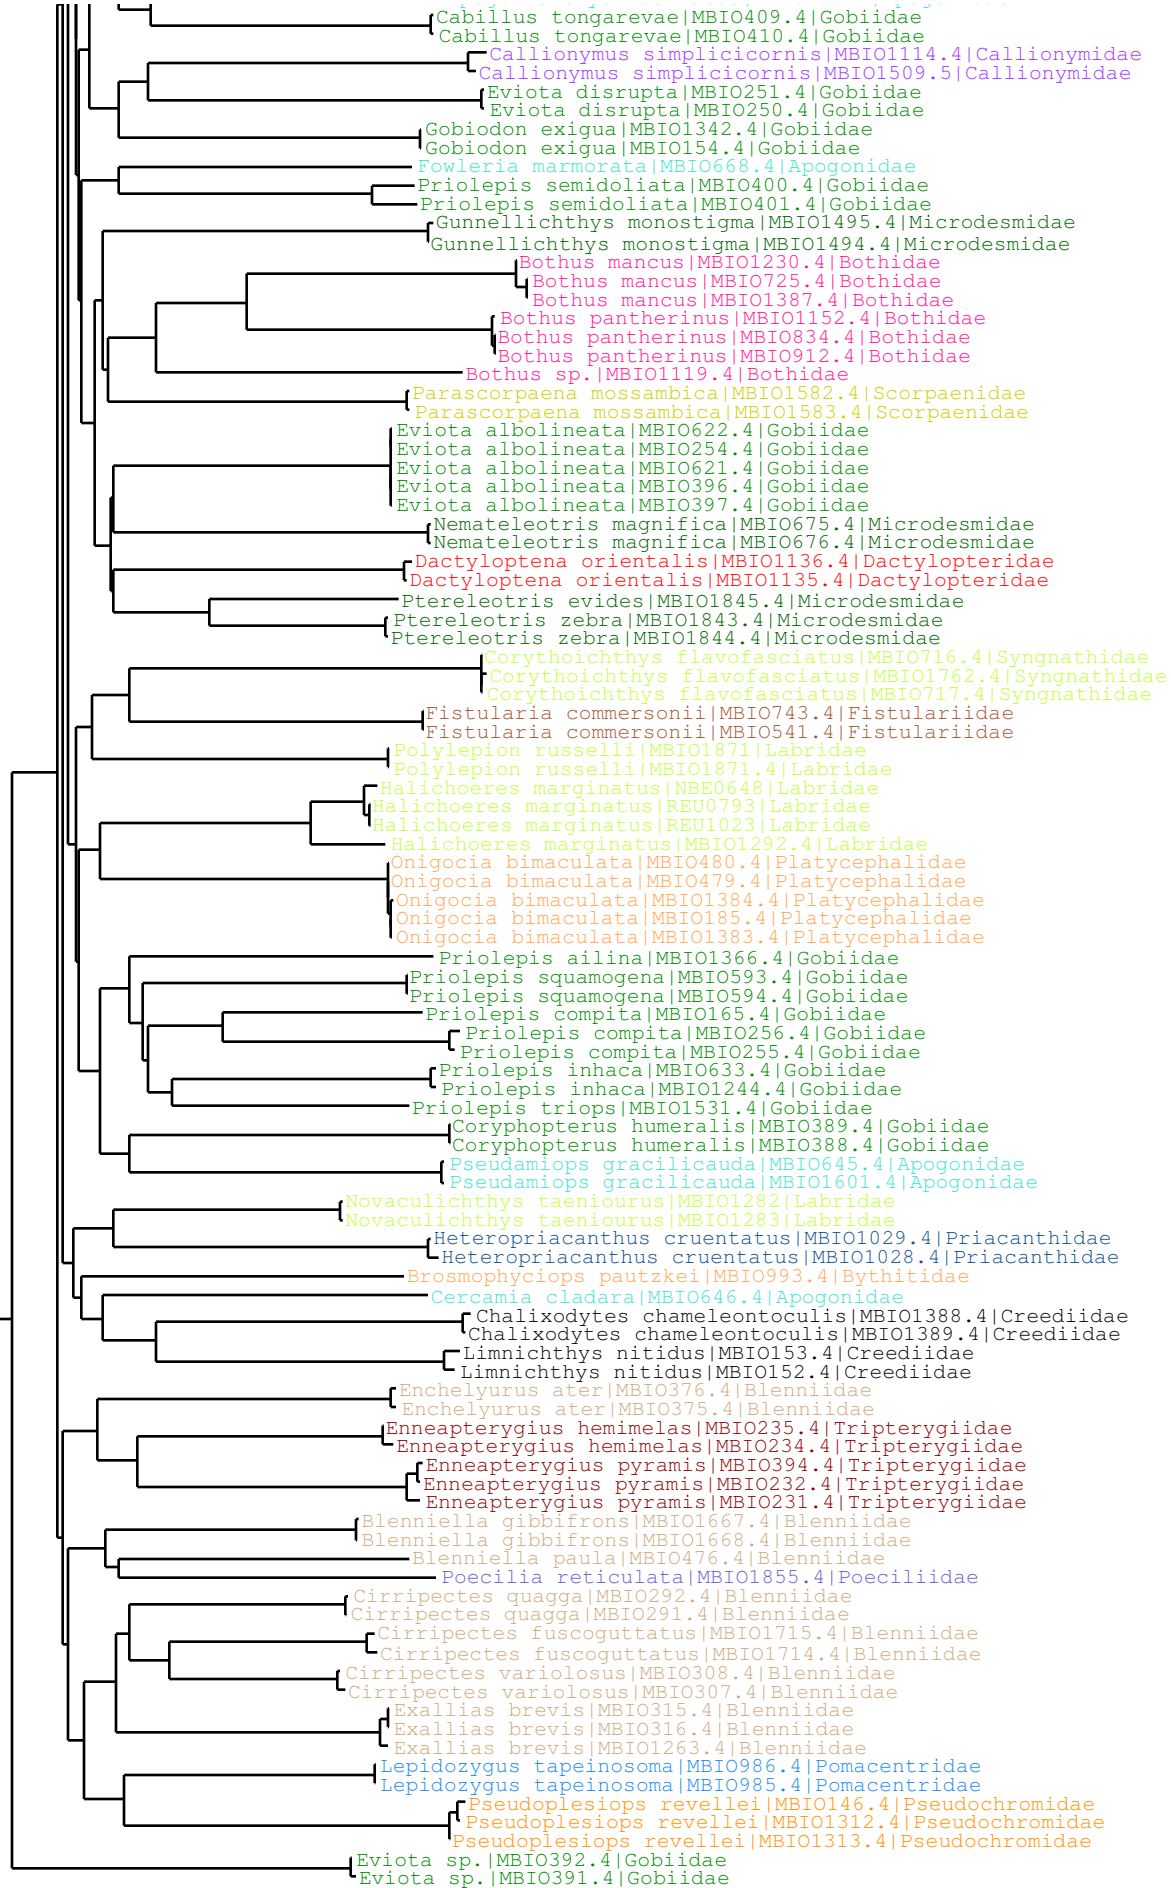

Supplement: pone.0028987.s004.pdf [file pone.0028987.s004.pdf]
